# Supplementary material for: Positive Association between Urinary Concentration of Phthalate Metabolites and Oxidation of DNA and Lipid in Adolescents and Young Adults
Source: PubMed Central journal article supplement (PMC5349565; doi:10.1038/srep44318), 2017-03-14
Supplement: srep44318-s1.pdf [file srep44318-s1.pdf]

1

## Supplementary Information

2 **Title: Positive Association between Urinary Concentration of Phthalate**3 **Metabolites and Oxidation of DNA and Lipid in Adolescents and Young Adults**

4 Chien-Yu Lin, Pau-Chung Chen, Chia-Jung Hsieh, Chao-Yu Chen, Anren Hu,

5 Fung-Chang Sung, Hui-Ling Lee, and Ta-Chen Su

6

7 Supplementary Figure S1: The structures of the nine phthalates and their  
8 metabolites

| No. | Phthalates                                                                                                                                              | Metabolites                                                                                                           |
|-----|---------------------------------------------------------------------------------------------------------------------------------------------------------|-----------------------------------------------------------------------------------------------------------------------|
| 1   | Dimethyl phthalate (DMP)<br>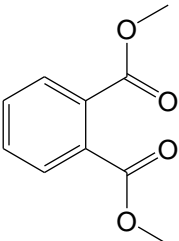                                          | Mono-methyl phthalate (MMP)<br>    |
| 2   | Diethyl phthalate (DEP)<br>                                          | Monoethyl phthalate (MEP)<br>     |
| 3   | Dibutyl phthalate (DBP)<br><br>Butylbenzyl phthalate (BBzP)<br>minor | Mono-n-butyl phthalate (MnBP)<br> |

|   |                                      |                                                   |
|---|--------------------------------------|---------------------------------------------------|
|   |                                      |                                                   |
| 4 | Di-isobutyl phthalate (DiBP)<br>     | Mono-isobutyl phthalate (MiBP)<br>                |
| 5 | Di-2-ethylhexyl phthalate (DEHP)<br> | Mono-2-ethylhexyl phthalate (MEHP)<br>            |
| 6 | Di-2-ethylhexyl phthalate (DEHP)<br> | Mono-2-ethyl-5-hydroxyhexyl phthalate (MEHHP)<br> |
| 7 | Di-2-ethylhexyl phthalate (DEHP)<br> | Mono-2-ethyl-5-oxo-hexyl phthalate (MEOHP)<br>    |
| 8 | Diisononyl phthalate (DINP)<br>      | Monoisononyl phthalate (MiNP)<br>                 |

|   |                                                                                                                          |                                                                                                                          |
|---|--------------------------------------------------------------------------------------------------------------------------|--------------------------------------------------------------------------------------------------------------------------|
|   | 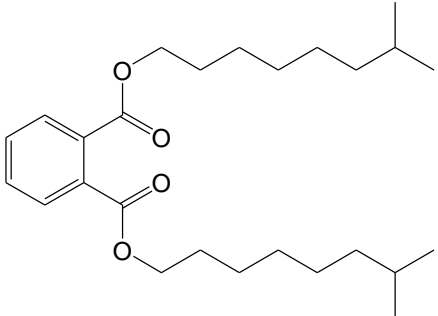                                        |                                        |
| 9 | <b>Butylbenzyl phthalate (BBzP)</b><br> | <b>Monobenzyl phthalate (MBzP)</b><br> |

1 Supplementary Table S2.: Basic demographics of the sample subjects including geometric means and their 95% confidence intervals of the urinary phthalate  
2 metabolites

|                            | No. | $\Sigma$ MEHP<br>( $\mu\text{mol/L}$ ) | MMP<br>( $\mu\text{g/L}$ ) | MiBP<br>( $\mu\text{g/L}$ ) | MEP<br>( $\mu\text{g/L}$ ) | MnBP<br>( $\mu\text{g/L}$ ) | MBzP<br>( $\mu\text{g/L}$ ) |
|----------------------------|-----|----------------------------------------|----------------------------|-----------------------------|----------------------------|-----------------------------|-----------------------------|
| Overall                    | 751 | 0.33<br>(0.30-0.35)                    | 10.98<br>(10.37-11.62)     | 22.07<br>(20.35-23.97)      | 45.64<br>(41.69-49.74)     | 51.95<br>(47.97-55.67)      | 2.82<br>(2.58-3.08)         |
| Age                        |     |                                        |                            |                             |                            |                             |                             |
| 12-19                      | 217 | 0.37*<br>(0.32-0.42)                   | 11.87<br>(10.67-13.21)     | 26.50**<br>(22.92-30.63)    | 42.84<br>(35.98-51.01)     | 57.47<br>(50.20-65.83)      | 2.81<br>(2.39-3.30)         |
| 20-30                      | 534 | 0.31*<br>(0.28-0.34)                   | 10.63<br>(9.93-11.38)      | 20.49**<br>(18.67-22.47)    | 46.83<br>(41.89-52.35)     | 49.86<br>(45.74-54.33)      | 2.82<br>(2.54-3.12)         |
| Gender                     |     |                                        |                            |                             |                            |                             |                             |
| Female                     | 449 | 0.33<br>(0.30-0.36)                    | 10.59<br>(9.83-11.40)      | 21.99<br>(19.87-24.34)      | 54.38**<br>(48.23-61.31)   | 51.54<br>(46.90-56.66)      | 2.64<br>(2.36-2.96)         |
| Male                       | 302 | 0.32<br>(0.29-0.36)                    | 11.58<br>(10.58-12.68)     | 22.17<br>(19.59-25.08)      | 35.17**<br>(30.39-40.69)   | 52.56<br>(46.85-58.97)      | 3.10<br>(2.70-3.55)         |
| Household income           |     |                                        |                            |                             |                            |                             |                             |
| <50000 NTD per month       | 292 | 0.34<br>(0.30-0.38)                    | 10.89<br>(9.93-11.95)      | 21.70<br>(19.14-24.61)      | 44.19<br>(38.02-51.37)     | 51.75<br>(46.06-58.15)      | 2.72<br>(2.37-3.12)         |
| $\geq$ 50000 NTD per month | 458 | 0.32<br>(0.29-0.35)                    | 11.02<br>(10.24-11.87)     | 22.28<br>(20.15-24.63)      | 46.76<br>(41.47-52.72)     | 52.10<br>(47.47-57.23)      | 2.89<br>(2.58-3.23)         |
| Smoking status             |     |                                        |                            |                             |                            |                             |                             |
| Non-current smoker         | 622 | 0.33                                   | 10.92                      | 22.43                       | 47.23                      | 53.43                       | 2.83                        |

|                                      |     |             |               |               |               |               |             |
|--------------------------------------|-----|-------------|---------------|---------------|---------------|---------------|-------------|
|                                      |     | (0.31-0.36) | (10.25-11.63) | (20.57-24.46) | (42.61-52.35) | (49.30-57.86) | (2.57-3.11) |
| < 10 cigarettes/day                  | 47  | 0.35        | 11.98         | 22.86         | 48.96         | 48.03         | 2.98        |
|                                      |     | (0.26-0.47) | (9.51-15.09)  | (16.71-31.28) | (33.68-71.16) | (35.91-64.20) | (2.10-4.21) |
| 10–19 cigarettes/day                 | 48  | 0.31        | 11.41         | 19.66         | 37.29         | 51.14         | 2.79        |
|                                      |     | (0.24-0.42) | (9.08-14.34)  | (14.41-26.79) | (25.76-54.00) | (38.36-68.17) | (1.98-3.93) |
| ≥ 20 cigarettes/day                  | 34  | 0.23        | 10.06         | 18.34         | 29.45         | 35.38         | 2.43        |
|                                      |     | (0.16-0.32) | (7.67-13.20)  | (12.69-26.50) | (18.97-45.70) | (25.13-49.80) | (1.62-3.65) |
| Current alcohol consumption          |     |             |               |               |               |               |             |
| No                                   | 682 | 0.33        | 10.83         | 21.66         | 45.41         | 51.41         | 2.79        |
|                                      |     | (0.30-0.35) | (10.20-11.51) | (19.95-23.50) | (41.14-50.10) | (47.61-55.48) | (2.54-3.05) |
| Yes                                  | 69  | 0.32        | 12.54         | 26.54         | 48.01         | 57.61         | 3.14        |
|                                      |     | (0.25-0.40) | (10.37-15.17) | (20.51-34.36) | (35.23-65.43) | (45.29-73.26) | (2.36-4.18) |
| Body mass index (kg/m <sup>2</sup> ) |     |             |               |               |               |               |             |
| <24                                  | 588 | 0.32        | 10.99         | 21.85         | 47.90         | 49.59*        | 2.69*       |
|                                      |     | (0.29-0.34) | (10.29-11.73) | (20.01-23.88) | (43.08-53.25) | (45.70-53.84) | (2.44-2.97) |
| ≥24                                  | 163 | 0.36        | 10.94         | 22.85         | 38.34         | 61.44*        | 3.32*       |
|                                      |     | (0.31-0.42) | (9.67-12.39)  | (19.32-27.03) | (31.37-46.85) | (52.56-71.81) | (2.76-4.00) |
| Hypertension                         |     |             |               |               |               |               |             |
| No                                   | 690 | 0.32        | 11.15         | 21.86         | 46.73         | 51.62         | 2.83        |
|                                      |     | (0.30-0.35) | (10.50-11.83) | (20.15-23.71) | (42.39-51.52) | (47.85-55.70) | (2.59-3.10) |
| Yes                                  | 61  | 0.35        | 9.22          | 24.52         | 34.97         | 55.81         | 2.65        |
|                                      |     | (0.27-0.46) | (7.53-11.29)  | (18.63-32.27) | (25.18-48.57) | (43.21-72.10) | (1.96-3.60) |
| DM                                   |     |             |               |               |               |               |             |

|                      |     |                     |                          |                        |                          |                        |                     |
|----------------------|-----|---------------------|--------------------------|------------------------|--------------------------|------------------------|---------------------|
| No                   | 735 | 0.33<br>(0.30-0.35) | 11.10<br>(10.48-11.76)   | 22.15<br>(20.47-23.97) | 46.11<br>(41.93-50.70)   | 52.19<br>(48.47-56.15) | 2.84<br>(2.61-3.10) |
| Yes                  | 16  | 0.28<br>(0.17-0.47) | 6.48<br>(4.37-9.60)      | 18.43<br>(10.77-31.53) | 28.45<br>(14.97-54.05)   | 42.00<br>(25.51-69.20) | 1.82<br>(1.01-3.30) |
| LDL-C (mg/dL)        |     |                     |                          |                        |                          |                        |                     |
| <130                 | 626 | 0.33<br>(0.30-0.35) | 11.14<br>(10.45-11.87)   | 22.15<br>(20.33-24.14) | 47.19<br>(42.61-52.30)   | 51.94<br>(47.94-56.26) | 2.86<br>(2.60-3.15) |
| ≥130                 | 125 | 0.31<br>(0.26-0.38) | 10.20<br>(8.86-11.74)    | 21.64<br>(17.95-26.21) | 38.63<br>(30.69-48.57)   | 51.98<br>(43.47-62.12) | 2.60<br>(2.10-3.22) |
| Triglyceride (mg/dL) |     |                     |                          |                        |                          |                        |                     |
| <160                 | 715 | 0.33<br>(0.30-0.35) | 11.21**<br>(10.58-11.89) | 22.18<br>(20.47-24.02) | 46.97**<br>(42.69-51.68) | 51.93<br>(48.18-55.98) | 2.79<br>(2.55-3.05) |
| ≥160                 | 36  | 0.33<br>(0.24-0.46) | 7.16**<br>(5.51-9.30)    | 19.92<br>(13.93-28.50) | 25.84**<br>(16.88-39.57) | 52.21<br>(37.41-72.82) | 3.48<br>(2.34-5.17) |

1 \*P < 0.05

2 \*\*P < 0.01

3  $\sum$ MEHP, sum of (MEHP/278)+(MEHHP/294)+(MEOHP/292)

Supplementary Table S3: Basic demographics of the sample subjects including geometric means and their 95% confidence intervals of the urinary 8-OHdG and 8-isoPGF<sub>2α</sub>

|                                      | No. | 8-OHdG (μg/L)      | 8-isoPGF <sub>2α</sub> (μg/L) |
|--------------------------------------|-----|--------------------|-------------------------------|
| Overall                              | 751 | 2.95 (2.79-3.10)   | 1.28 (1.20-1.36)              |
| Age                                  |     |                    |                               |
| 12-19                                | 217 | 3.03 (2.75-3.35)   | 1.05(0.93-1.19)**             |
| 20-30                                | 534 | 2.91 (2.73-3.10)   | 1.39 (1.28-1.50)**            |
| Gender                               |     |                    |                               |
| Female                               | 449 | 2.61 (2.44-2.79)** | 1.20 (1.10-1.31)*             |
| Male                                 | 302 | 3.54 (3.26-3.84)** | 1.41 (1.27-1.57)*             |
| Household income                     |     |                    |                               |
| <50000 NT dollars per month          | 292 | 3.01 (2.77 -3.28)  | 1.25 (1.12-1.40)              |
| ≥50000 NT dollars per month          | 458 | 2.90 (2.71-3.10)   | 1.30 (1.19-1.41)              |
| Smoking status                       |     |                    |                               |
| Non-current smoker                   | 622 | 2.91 (2.74-3.08)   | 1.24 (1.15-1.33)              |
| < 10 cigarettes/day                  | 47  | 2.80 (2.26-3.46)   | 1.54 (1.18-2.01)              |
| 10–19 cigarettes/day                 | 48  | 3.51 (2.85-4.33)   | 1.50 (1.15-1.95)              |
| ≥ 20 cigarettes/day                  | 34  | 3.17(2.47-4.06)    | 1.44 (1.05-1.97)              |
| Current alcohol consumption          |     |                    |                               |
| No                                   | 682 | 2.91 (2.75-3.08)   | 1.28 (1.20-1.38)              |
| Yes                                  | 69  | 3.31 (2.78-3.95)   | 1.24 (0.99-1.54)              |
| Body mass index (kg/m <sup>2</sup> ) |     |                    |                               |
| <24                                  | 588 | 3.01 (2.83-3.19)   | 1.26 (1.16-1.36)              |
| ≥24                                  | 163 | 2.74 (2.44-3.07)   | 1.37 (1.18-1.58)              |
| Hypertension                         |     |                    |                               |
| No                                   | 690 | 2.95 (2.79-3.11)   | 1.27 (1.18-1.36)              |
| Yes                                  | 61  | 2.96 (2.46-2.57)   | 1.43 (1.13-1.80)              |
| DM                                   |     |                    |                               |
| No                                   | 735 | 2.98 (2.83-3.15)** | 1.28 (1.19-1.37)              |
| Yes                                  | 16  | 1.68 (1.17-2.41)** | 1.34 (0.85-2.13)              |
| LDL-C (mg/dL)                        |     |                    |                               |
| <130                                 | 626 | 2.99(2.83-3.17)    | 1.28(1.19-1.37)               |
| ≥130                                 | 125 | 2.72(2.39-3.10)    | 1.30(1.10-1.53)               |
| Triglyceride (mg/dL)                 |     |                    |                               |
| <160                                 | 715 | 2.98(2.82-3.15)    | 1.28(1.20-1.37)               |
| ≥160                                 | 36  | 2.35(1.85-2.99)    | 1.22(0.90-1.66)               |

\*P < 0.05

\*\*P < 0.01
